# Supplementary material for: A multicenter prospective study on the diagnostic performance of a new liquid rapid urease test for the diagnosis of Helicobacter pylori infection
Source: PubMed Central journal article supplement (PMC5740919; doi:10.1186/s13099-017-0226-5), 2017-12-22
Supplement: 13099_2017_226_MOESM1_ESM.pdf [file 13099_2017_226_MOESM1_ESM.pdf]

| Pat. ID | Region | Sex | Age | Indication | Underlying Disease | Concomittant Medication | Endoscopy result | Other result        | HUT | Histol. |
|---------|--------|-----|-----|------------|--------------------|-------------------------|------------------|---------------------|-----|---------|
| 1       | 1      | 2   | 89  | 1          | 1,2                | 1                       | 3                |                     | 0   | 0       |
| 2       | 1      | 2   | 25  | 2          | 0                  | 2                       | 0                |                     | 0   | 0       |
| 3       | 2      | 1   | 54  | 7          | 0                  | 0                       | 5                | Portal hypertension | 1   | 0       |
| 4       | 2      | 1   | 53  | 7          | 0                  | 0                       | 5                | Hiatal hernia       | 1   | 1       |
| 5       | 2      | 2   | 23  | 6          | 0                  | 0                       | 1                |                     | 0   | 0       |
| 6       | 2      | 1   | 55  | 7          | 0                  | 0                       | 1                |                     | 1   | 1       |
| 7       | 2      | 1   | 50  | 7          | 0                  | 0                       | 1                |                     | 0   | 0       |
| 8       | 2      | 1   | 61  | 7          | 0                  | 0                       | 0                |                     | 1   | 0       |
| 9       | 2      | 1   | 47  | 7          | 0                  | 0                       | 1, 2             |                     | 0   | 0       |
| 10      | 2      | 1   | 67  | 7          | 1                  | 0                       | 1, 5             | Angiodysplasia      | 1   | 1       |
| 11      | 2      | 1   | 51  | 0          | 0                  | 0                       | 1, 2, 5          | Hiatal hernia       | 0   | 0       |
| 12      | 2      | 1   | 55  | 7          | 1                  | 1                       | 1, 2, 3, 5       | Hiatal hernia       | 0   | 1       |
| 13      | 2      | 1   | 51  | 7          | 0                  | 0                       | 1, 2, 5          | Hiatal hernia       | 0   | 0       |
| 14      | 2      | 1   | 50  | 1          | 0                  | 0                       | 1, 5             | Hiatal hernia       | 0   | 0       |
| 15      | 2      | 1   | 58  | 9          | 1                  | 0                       | 1                |                     | 0   | 0       |
| 16      | 2      | 2   | 62  | 3          | 0                  | 0                       | 1                |                     | 0   | 0       |
| 17      | 2      | 2   | 73  | 7          | 0                  | 1                       | 0                |                     | 1   | 1       |
| 18      | 2      | 2   | 64  | 1          | 0                  | 0                       | 1                |                     | 1   | 1       |
| 19      | 2      | 1   | 33  | 3          | 0                  | 0                       | 0                |                     | 1   | 1       |
| 20      | 2      | 1   | 50  | 1          | 0                  | 0                       | 2                |                     | 0   | 0       |
| 21      | 2      | 2   | 76  | 2          | 0                  | 0                       | 1, 2             |                     | 0   | 0       |
| 22      | 2      | 2   | 73  | 1          | 0                  | 2                       | 0                |                     | 0   | 1       |
| 23      | 2      | 2   | 19  | 1          | 0                  | 0                       | 1                |                     | 0   | 0       |
| 24      | 2      | 2   | 59  | 7          | 0                  | 1                       | 0                |                     | 0   | 0       |
| 25      | 2      | 1   | 51  | 2          | 0                  | 0                       | 0                |                     | 0   | 0       |
| 26      | 2      | 2   | 74  | 3          | 0                  | 0                       | 5                | Hiatal hernia       | 1   | 1       |
| 27      | 2      | 2   | 66  | 3          | 0                  | 0                       | 5                | Hyperplastic polyps | 0   | 0       |
| 28      | 2      | 2   | 63  | 2          | 0                  | 3                       | 1                |                     | 0   | 0       |
| 29      | 2      | 1   | 28  | 1          | 0                  | 0                       | 0                |                     | 0   | 0       |
| 30      | 2      | 2   | 66  | 1          | 0                  | 0                       | 1, 2, 5          | Hiatal hernia       | 0   | 1       |
| 31      | 2      | 2   | 50  | 3          | 0                  | 2                       | 0                |                     | 0   | 0       |

|    |   |   |    |    |      |      |         |                     |   |   |
|----|---|---|----|----|------|------|---------|---------------------|---|---|
| 32 | 2 | 2 | 52 | 3  | 0    | 0    | 5       | Hiatal hernia       | 0 | 0 |
| 33 | 2 | 2 | 40 | 1  | 0    | 2    | 0       |                     | 0 | 0 |
| 34 | 2 | 1 | 56 | 3  | 2, 5 | 0    | 1, 2, 5 | Schatzki's ring     | 0 | 0 |
| 35 | 2 | 2 | 27 | 3  | 0    | 0    | 5       | Hiatal hernia       | 0 | 0 |
| 36 | 2 | 2 | 44 | 8  | 0    | 0    | 0       |                     | 1 | 0 |
| 37 | 2 | 2 | 80 | 8  | 6    | 2    | 5       | Hiatal hernia       | 0 | 0 |
| 38 | 2 | 1 | 58 | 1  | 0    | 0    | 1       |                     | 0 | 0 |
| 39 | 2 | 2 | 34 | 3  | 0    | 0    | 5       | Hyperplastic polyps | 0 | 0 |
| 40 | 2 | 2 | 49 | 3  | 0    | 0    | 0       |                     | 1 | 1 |
| 41 | 2 | 2 | 27 | 1  | 0    | 0    | 0       |                     | 1 | 0 |
| 42 | 2 | 2 | 23 | 9  | 0    | 3    | 0       |                     | 1 | 0 |
| 43 | 2 | 1 | 71 | 0  | 2    | 2, 3 | 2       |                     | 0 | 0 |
| 44 | 2 | 2 | 52 | 10 | 0    | 0    | 0       |                     | 1 | 1 |
| 45 | 2 | 2 | 33 | 1  | 0    | 0    | 0       |                     | 0 | 0 |
| 46 | 2 | 2 | 36 | 5  | 0    | 2    | 1       |                     | 1 | 1 |
| 47 | 2 | 2 | 59 | 3  | 0    | 0    | 1, 5    | Hiatal hernia       | 0 | 0 |
| 48 | 2 | 2 | 57 | 7  | 0    | 0    | 5       | Hiatal hernia       | 0 | 0 |
| 49 | 2 | 2 | 41 | 7  | 0    | 0    | 1, 5    | Hiatal hernia       | 1 | 1 |
| 50 | 2 | 2 | 30 | 1  | 0    | 2    | 0       |                     | 0 | 0 |
| 51 | 2 | 2 | 25 | 8  | 0    | 0    | 1       |                     | 1 | 1 |
| 52 | 2 | 2 | 70 | 2  | 0    | 0    | 1, 5    | Hiatal hernia       | 1 | 1 |
| 53 | 2 | 2 | 75 | 3  | 0    | 0    | 0       |                     | 0 | 0 |
| 54 | 2 | 2 | 49 | 1  | 6    | 0    | 1       |                     | 0 | 0 |
| 55 | 2 | 2 | 75 | 0  | 0    | 0    | 2, 5    | Hiatal hernia       | 0 | 0 |
| 56 | 2 | 2 | 30 | 1  | 0    | 0    | 5       | Hiatal hernia       | 0 | 0 |
| 57 | 2 | 2 | 52 | 1  | 0    | 2    | 1       |                     | 1 | 0 |
| 58 | 2 | 2 | 58 | 1  | 1    | 0    | 1, 5    | Hiatal hernia       | 0 | 0 |
| 59 | 2 | 2 | 67 | 3  | 0    | 2    | 2       |                     | 0 | 0 |
| 60 | 2 | 1 | 53 | 3  | 0    | 0    | 1, 5    | Hiatal hernia       | 0 | 1 |
| 61 | 2 | 2 | 34 | 5  | 0    | 0    | 5       | Villous atrophy     | 0 | 1 |
| 62 | 2 | 2 | 35 | 4  | 6    | 1    | 5       | Hiatal hernia       | 0 | 0 |
| 63 | 2 | 2 | 76 | 10 | 0    | 0    | 5       | Hiatal hernia       | 0 | 0 |

|    |   |   |    |    |      |   |         |                 |   |   |
|----|---|---|----|----|------|---|---------|-----------------|---|---|
| 64 | 2 | 2 | 57 | 1  | 0    | 0 | 0       |                 | 1 | 1 |
| 65 | 2 | 1 | 40 | 0  | 0    | 0 | 1       |                 | 0 | 0 |
| 66 | 2 | 2 | 42 | 10 | 0    | 0 | 1       |                 | 0 | 0 |
| 67 | 2 | 2 | 40 | 3  | 0    | 4 | 1, 5    | Hiatal hernia   | 0 | 0 |
| 68 | 2 | 1 | 30 | 10 | 0    | 1 | 1       |                 | 1 | 1 |
| 69 | 2 | 1 | 42 | 1  | 0    | 0 | 1       |                 | 0 | 0 |
| 70 | 2 | 2 | 63 | 3  | 0    | 0 | 4       |                 | 1 | 1 |
| 71 | 2 | 2 | 38 | 1  | 0    | 0 | 0       |                 | 0 | 0 |
| 72 | 2 | 2 | 63 | 1  | 6    | 1 | 1       |                 | 0 | 0 |
| 73 | 2 | 2 | 49 | 10 | 0    | 0 | 5       | Hiatal hernia   | 0 | 0 |
| 74 | 2 | 1 | 54 | 3  | 0    | 0 | 1, 2, 5 | Hiatal hernia   | 0 | 0 |
| 75 | 2 | 2 | 49 | 1  | 0    | 0 | 1       |                 | 1 | 1 |
| 76 | 2 | 2 | 34 | 4  | 0    | 0 | 0       |                 | 0 | 0 |
| 77 | 2 | 2 | 59 | 7  | 0    | 0 | 0       |                 | 0 | 0 |
| 78 | 2 | 2 | 33 | 1  | 0    | 0 | 0       |                 | 0 | 0 |
| 79 | 2 | 2 | 49 | 1  | 0    | 2 | 1       |                 | 0 | 0 |
| 80 | 2 | 2 | 44 | 3  | 0    | 0 | 0       |                 | 0 | 0 |
| 81 | 2 | 2 | 24 | 1  | 0    | 0 | 5       | Villous atrophy | 0 | 0 |
| 82 | 1 | 2 | 76 | 7  | 1, 3 | 2 | 1       |                 | 0 | 0 |
| 83 | 1 | 2 | 38 | 3  | 0    | 2 | 1, 2    |                 | 0 | 0 |
| 84 | 1 | 2 | 31 | 1  | 0    | 0 | 0       |                 | 0 | 0 |
| 85 | 1 | 2 | 30 | 3  | 0    | 0 | 1       |                 | 0 | 0 |
| 86 | 1 | 2 | 70 | 3  | 0    | 0 | 1, 2    |                 | 1 | 0 |
| 87 | 1 | 2 | 25 | 1  | 0    | 0 | 1, 2    |                 | 0 | 0 |
| 88 | 1 | 1 | 25 | 1  | 0    | 0 | 1       |                 | 0 | 0 |
| 89 | 1 | 1 | 73 | 3  | 0    | 0 | 1, 2    |                 | 0 | 0 |
| 90 | 1 | 2 | 42 | 1  | 0    | 0 | 1       |                 | 0 | 0 |
| 91 | 1 | 2 | 59 | 3  | 0    | 0 | 1       |                 | 0 | 0 |
| 92 | 1 | 2 | 59 | 3  | 0    | 0 | 1, 2    |                 | 0 | 0 |
| 93 | 1 | 2 | 22 | 1  | 0    | 0 | 1       |                 | 0 | 0 |
| 94 | 1 | 1 | 31 | 1  | 0    | 0 | 1       |                 | 0 | 0 |
| 95 | 1 | 2 | 29 | 1  | 0    | 2 | 1       |                 | 0 | 0 |

|     |   |   |    |   |   |         |            |                      |   |   |
|-----|---|---|----|---|---|---------|------------|----------------------|---|---|
| 96  | 1 | 2 | 38 | 1 | 0 | 0       | 0          |                      | 0 | 0 |
| 97  | 1 | 1 | 67 | 2 | 0 | 0       | 1, 5       | Esophageal divertic. | 1 | 1 |
| 98  | 1 | 2 | 22 | 1 | 0 | 2       | 1, 2       |                      | 0 | 0 |
| 99  | 1 | 2 | 42 | 8 | 0 | 0       | 0          |                      | 1 | 1 |
| 100 | 1 | 2 | 33 | 3 | 0 | 0       | 1, 3       |                      | 0 | 0 |
| 101 | 1 | 2 | 28 | 1 | 6 | 0       | 5          | Plaque esophagus     | 0 | 0 |
| 102 | 1 | 2 | 53 | 1 | 0 | 0       | 1, 3       |                      | 1 | 1 |
| 103 | 1 | 1 | 22 | 1 | 0 | 0       | 2          |                      | 0 | 0 |
| 104 | 1 | 2 | 49 | 3 | 0 | 2       | 1          |                      | 0 | 0 |
| 105 | 1 | 2 | 26 | 1 | 0 | 0       | 1          |                      | 0 | 0 |
| 106 | 1 | 2 | 65 | 3 | 1 | 2       | 1, 2, 3, 5 | Portal hypertension  | 1 | 1 |
| 107 | 1 | 2 | 61 | 3 | 0 | 0       | 1          |                      | 0 | 0 |
| 108 | 1 | 2 | 59 | 5 | 2 | 3       | 1, 2       |                      | 0 | 0 |
| 109 | 1 | 2 | 68 | 2 | 0 | 1       | 1, 2       |                      | 1 | 0 |
| 110 | 1 | 2 | 20 | 1 | 0 | 0       | 1          |                      | 0 | 0 |
| 111 | 1 | 2 | 36 | 1 | 0 | 0       | 2          |                      | 0 | 0 |
| 112 | 1 | 2 | 41 | 1 | 0 | 0       | 0          |                      | 0 | 0 |
| 113 | 1 | 1 | 18 | 1 | 0 | 0       | 1          |                      | 0 | 0 |
| 114 | 1 | 2 | 18 | 3 | 0 | 2       | 1          |                      | 0 | 0 |
| 115 | 1 | 2 | 38 | 1 | 0 | 0       | 1          |                      | 0 | 0 |
| 116 | 1 | 1 | 35 | 1 | 0 | 0       | 1          |                      | 1 | 1 |
| 117 | 1 | 1 | 24 | 1 | 0 | 1       | 2          |                      | 0 | 0 |
| 118 | 1 | 1 | 54 | 3 | 0 | 0       | 1, 2       |                      | 0 | 0 |
| 119 | 1 | 2 | 40 | 1 | 0 | 2       | 1          |                      | 1 | 1 |
| 120 | 1 | 2 | 34 | 5 | 0 | 2, 3, 4 | 1          |                      | 1 | 1 |
| 121 | 1 | 2 | 19 | 1 | 0 | 2       | 1          |                      | 0 | 0 |
| 122 | 1 | 2 | 19 | 1 | 0 | 0       | 0          |                      | 0 | 0 |
| 123 | 1 | 2 | 22 | 7 | 0 | 2       | 5          | Hiatal hernia        | 0 | 0 |
| 124 | 1 | 2 | 54 | 3 | 0 | 0       | 1          |                      | 0 | 0 |
| 125 | 1 | 2 | 60 | 3 | 0 | 0       | 1, 2       |                      | 0 | 0 |
| 126 | 1 | 1 | 57 | 1 | 0 | 0       | 1, 2, 5    | Hiatal hernia        | 1 | 1 |
| 127 | 1 | 2 | 57 | 3 | 0 | 0       | 2, 5       | Hiatal hernia        | 0 | 0 |

|     |   |   |    |    |      |   |         |                     |   |   |
|-----|---|---|----|----|------|---|---------|---------------------|---|---|
| 128 | 1 | 2 | 30 | 1  | 0    | 0 | 1       |                     | 1 | 0 |
| 129 | 1 | 2 | 57 | 3  | 0    | 2 | 1, 5    | Hiatal hernia       | 0 | 0 |
| 130 | 1 | 1 | 30 | 1  | 0    | 0 | 1, 5    | Hiatal hernia       | 0 | 0 |
| 131 | 1 | 2 | 54 | 1  | 0    | 1 | 1, 2    |                     | 0 | 0 |
| 132 | 1 | 2 | 34 | 1  | 0    | 2 | 1       |                     | 0 | 0 |
| 133 | 1 | 2 | 18 | 1  | 0    | 0 | 0       |                     | 0 | 0 |
| 134 | 1 | 2 | 54 | 3  | 0    | 0 | 1, 2    |                     | 1 | 1 |
| 135 | 1 | 2 | 27 | 1  | 3    | 0 | 1       |                     | 0 | 0 |
| 136 | 3 | 1 | 55 | 1  | 0    | 0 | 1, 2, 5 | Esophageal varices  | 0 | 0 |
| 137 | 3 | 2 | 37 | 0  | 0    | 0 | 0       |                     | 0 | 0 |
| 138 | 3 | 2 | 48 | 6  | 0    | 0 | 2       |                     | 0 | 0 |
| 139 | 3 | 2 | 78 | 2  | 1, 4 | 2 | 1       |                     | 0 | 0 |
| 140 | 3 | 2 | 51 | 7  | 0    | 0 | 2, 4    |                     | 0 | 0 |
| 141 | 3 | 2 | 36 | 1  | 0    | 0 | 1       |                     | 0 | 0 |
| 142 | 3 | 2 | 73 | 1  | 0    | 0 | 5       | goose pimple stom.  | 0 | 1 |
| 143 | 3 | 2 | 57 | 7  | 3    | 0 | 1, 5    | Angiodysplasia      | 0 | 0 |
| 144 | 3 | 2 | 31 | 6  | 1, 6 | 3 | 5       | Hyperplastic polyps | 0 | 0 |
| 145 | 3 | 2 | 27 | 1  | 0    | 0 | 5       | Hyperplastic polyps | 0 | 0 |
| 146 | 3 | 2 | 18 | 1  | 0    | 2 | 1       |                     | 0 | 0 |
| 147 | 3 | 1 | 51 | 7  | 0    | 0 | 1, 2    |                     | 0 | 0 |
| 148 | 3 | 1 | 49 | 3  | 0    | 1 | 1       |                     | 0 | 0 |
| 149 | 3 | 2 | 35 | 3  | 0    | 0 | 2       |                     | 1 | 1 |
| 150 | 3 | 1 | 50 | 7  | 0    | 0 | 5       | Hiatal hernia       | 0 | 0 |
| 151 | 3 | 1 | 46 | 1  | 0    | 0 | 2       |                     | 0 | 0 |
| 152 | 3 | 1 | 74 | 3  | 0    | 0 | 1, 2    |                     | 0 | 0 |
| 153 | 3 | 1 | 74 | 8  | 0    | 0 | 2       |                     | 0 | 0 |
| 154 | 3 | 2 | 22 | 9  | 0    | 0 | 1       |                     | 1 | 1 |
| 155 | 3 | 2 | 75 | 10 | 0    | 0 | 1, 5    | Hiatal hernia       | 1 | 1 |
| 156 | 3 | 1 | 35 | 5  | 0    | 0 | 1, 2    |                     | 0 | 0 |
| 157 | 3 | 2 | 18 | 1  | 3    | 0 | 5       | Erosions            | 0 | 0 |
| 158 | 3 | 1 | 63 | 7  | 1    | 0 | 5       | Hiatal hernia       | 0 | 0 |
| 159 | 3 | 1 | 56 | 7  | 0    | 3 | 1, 2, 5 | Barrett's esophagus | 0 | 0 |

|     |   |   |    |    |   |   |         |                      |   |   |
|-----|---|---|----|----|---|---|---------|----------------------|---|---|
| 160 | 3 | 1 | 40 | 3  | 0 | 0 | 2       |                      | 0 | 0 |
| 161 | 3 | 2 | 53 | 1  | 0 | 0 | 1, 5    | Angiodysplasia       | 0 | 0 |
| 162 | 3 | 2 | 24 | 9  | 0 | 0 | 0       |                      | 0 | 0 |
| 163 | 3 | 2 | 92 | 2  | 0 | 0 | 1, 2    |                      | 0 | 0 |
| 164 | 3 | 1 | 45 | 1  | 0 | 0 | 1, 2    |                      | 0 | 0 |
| 165 | 3 | 2 | 66 | 10 | 0 | 0 | 1, 2    |                      | 1 | 1 |
| 166 | 3 | 2 | 72 | 1  | 0 | 0 | 1, 5    | Hiatal hernia        | 0 | 0 |
| 167 | 3 | 1 | 69 | 10 | 0 | 0 | 1, 5    | St.p. Billroth II    | 0 | 0 |
| 168 | 3 | 2 | 65 | 3  | 0 | 0 | 1, 2    |                      | 0 | 0 |
| 169 | 3 | 1 | 49 | 9  | 0 | 0 | 1       |                      | 0 | 0 |
| 170 | 3 | 2 | 75 | 7  | 1 | 0 | 1, 5    | Hiatal hernia        | 0 | 0 |
| 171 | 3 | 2 | 60 | 7  | 6 | 0 | 5       | Hiatal hernia        | 0 | 0 |
| 172 | 3 | 1 | 78 | 3  | 0 | 0 | 1, 2    |                      | 0 | 0 |
| 173 | 3 | 1 | 62 | 3  | 1 | 2 | 1       |                      | 0 | 0 |
| 174 | 3 | 2 | 65 | 7  | 0 | 0 | 1, 2    |                      | 0 | 0 |
| 175 | 3 | 1 | 42 | 3  | 0 | 0 | 1, 4, 5 | Hiatal hernia        | 1 | 1 |
| 176 | 3 | 2 | 22 | 0  | 0 | 0 | 0       |                      | 0 | 0 |
| 177 | 3 | 2 | 19 | 5  | 0 | 0 | 0       |                      | 0 | 0 |
| 178 | 3 | 2 | 79 | 9  | 0 | 0 | 4, 5    | Hiatal hernia        | 1 | 1 |
| 179 | 3 | 1 | 63 | 7  | 0 | 0 | 1, 2, 5 | Hiatal hernia        | 0 | 0 |
| 180 | 3 | 1 | 47 | 1  | 0 | 0 | 1, 2, 5 | Hiatal hernia        | 1 | 1 |
| 181 | 3 | 2 | 54 | 3  | 0 | 2 | 1, 3, 5 | Zenker's diverticul. | 1 | 1 |
| 182 | 3 | 2 | 36 | 1  | 0 | 0 | 1       |                      | 0 | 0 |
| 183 | 1 | 2 | 47 | 1  | 0 | 0 | 1, 3    |                      | 1 | 1 |

| <b>Legend</b>               |                    | <b>Indication</b>                                                                         | <b>Underlying disease</b>                                                                                  | <b>Concomittant medication</b>                                                                                                                          | <b>HUT / Histology</b>                                                                            |                                |
|-----------------------------|--------------------|-------------------------------------------------------------------------------------------|------------------------------------------------------------------------------------------------------------|---------------------------------------------------------------------------------------------------------------------------------------------------------|---------------------------------------------------------------------------------------------------|--------------------------------|
| <b>Region</b>               | <b>Sex</b>         | 0=Unknown<br>1=Abdominal pain<br>2=Dysphagia<br>3=Reflux<br>4=Anemia<br>5=Celiac disease? | 6=Inflammatory Bowel Disease?<br>7=Screening<br>8=GI bleeding<br>9=Irritable Bowel Syndrome?<br>10=Various | 1=Diabetes<br>2=Hemato-oncological<br>3=Urogenital infections<br>4=Pneumonia<br>5=Chronic obstructive pulmonary disease<br>6=Inflammatory Bowel disease | 1=Non steroidal anitnflammatory drugs<br>2=Proton pump inhibitor<br>3=Cortisone<br>4=Methotrexate | 0=HP negative<br>1=HP positive |
| 1=East<br>2=West<br>3=South | 1=male<br>2=female |                                                                                           |                                                                                                            |                                                                                                                                                         | <b>Endoscopy result</b><br>1=Gastritis<br>2=Esophagitis<br>3=Peptic ulcer<br>4=Tumor<br>5=Other   |                                |
